# Supplementary material for: Synthesis, structure, luminescence and catalytic properties of cadmium(ii) coordination polymers with 9H-carbazole-2,7-dicarboxylic acid
Source: Royal Society of Chemistry journal article supplement (doi:10.1039/c3dt53109k), 2013-12-16
Supplement: c3dt53109k.pdf [file c3dt53109k.pdf]

## Electronic Supplementary Information (ESI)

### Synthesis, structure, luminescence and catalytic properties of cadmium(II) coordination polymers with 9H-carbazole-2,7-dicarboxylic acid<sup>†</sup>

Xiu-Chun Yi, Meng-Xuan Huang, Yan Qi and En-Qing Gao\*

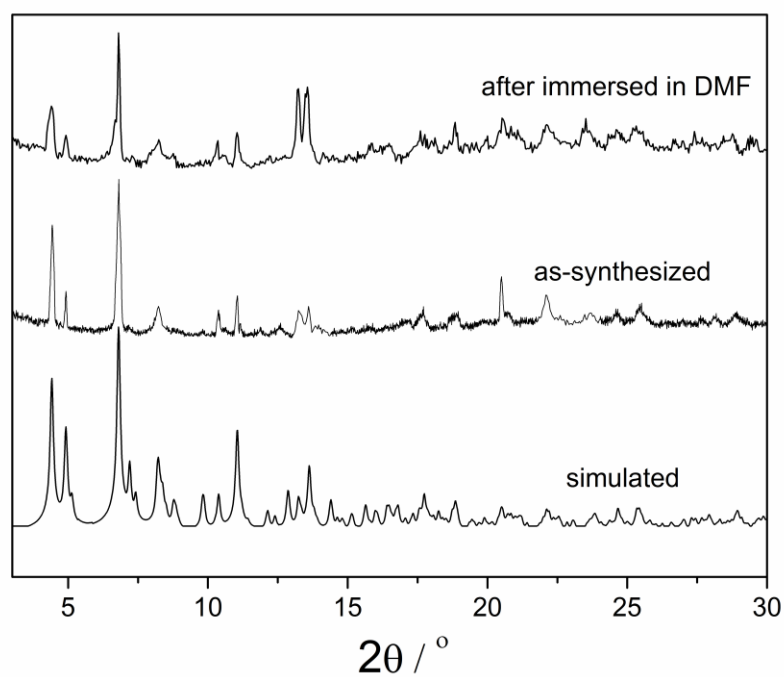

Fig. S1 The powder XRD profiles of the samples before and after the DMF treatment.
